# Supplementary material
Source: Royal Society of Chemistry journal article supplement (doi:10.1039/d6dt00422a)
Supplement: d6dt00422a1.pdf [file d6dt00422a1.pdf]

Supporting Information for:

**Investigation of the metal-binding site 2 of *Y. pestis* YfeA protein: solution studies of Fe(II), Mn(II), and Zn(II) complexes**

**Bartosz Orzel<sup>a</sup>, Malgorzata Ostrowska<sup>a</sup>, Slawomir Potocki<sup>a</sup>, Massimiliano Peana<sup>b</sup>, and Elzbieta Gumienna-Kontecka<sup>a\*</sup>**

<sup>a</sup>Faculty of Chemistry, University of Wrocław, 50-383 Wrocław, Poland

<sup>b</sup>Department of Chemical, Physical, Mathematical and Natural Sciences, University of Sassari, 07100 Sassari, Italy

\*Email: [elzbieta.gumienna-kontecka@uwr.edu.pl](mailto:elzbieta.gumienna-kontecka@uwr.edu.pl)

**Table S1.** Hydrolysis constants for Mn(II), Zn(II) and Fe(II) ions for  $I = 0.1\text{M}$  ionic strength,  $T = 298\text{ K}$ .<sup>a</sup>

| Species                | $\log \beta$ |
|------------------------|--------------|
| <b>Mn(II)</b>          |              |
| $\text{Mn(OH)}^+$      | -10.78       |
| $\text{Mn(OH)}_2$      | -22.39       |
| $\text{Mn(OH)}_3^-$    | -34.34       |
| $\text{Mn(OH)}_4^{2-}$ | -47.82       |
| <b>Zn(II)</b>          |              |
| $\text{Zn(OH)}^+$      | -9.12        |
| $\text{Zn(OH)}_2$      | -18.08       |
| $\text{Zn(OH)}_3^-$    | -27.97       |
| $\text{Zn(OH)}_4^{2-}$ | -39.50       |
| <b>Fe(II)</b>          |              |
| $\text{Fe(OH)}^+$      | -9.63        |
| $\text{Fe(OH)}_2$      | -20.73       |
| $\text{Fe(OH)}_3^-$    | -32.68       |

<sup>a</sup> The hydrolysis constants for zero ionic strength<sup>4</sup> were recalculated to 0.1 M ionic strength with an appropriate formula.<sup>5</sup>

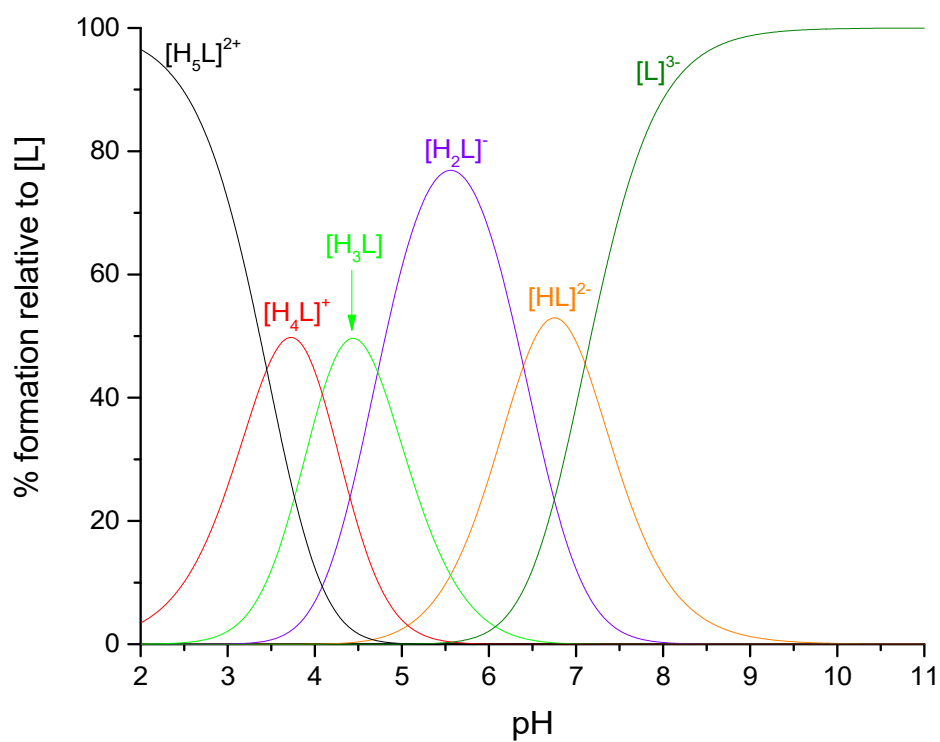

**Fig**

**re S1.** Distribution diagram of the protonation equilibria of Ac-VEHDPHAHAET-NH<sub>2</sub>.

$L_{[\text{tot}]} = 0.5\text{ mM}$ .

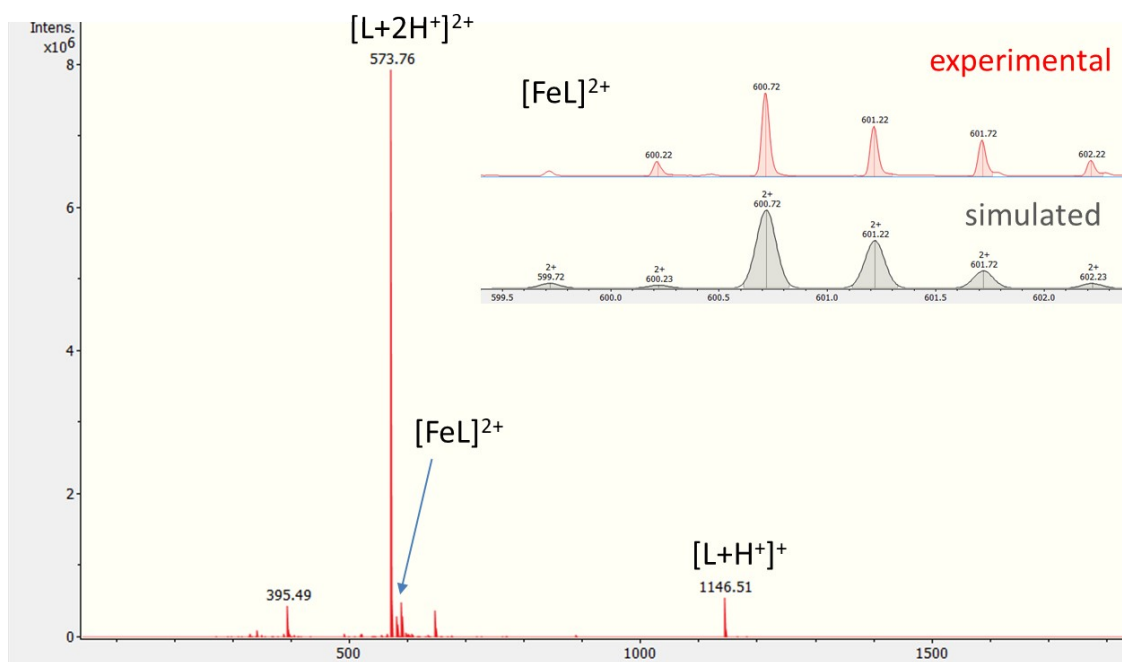

**Figure S2.** Mass spectrum acquired for Fe(II):L1 system. The comparison of the experimental and simulated isotopic pattern of the peak at  $m/z = 599.72$  is shown on the right.

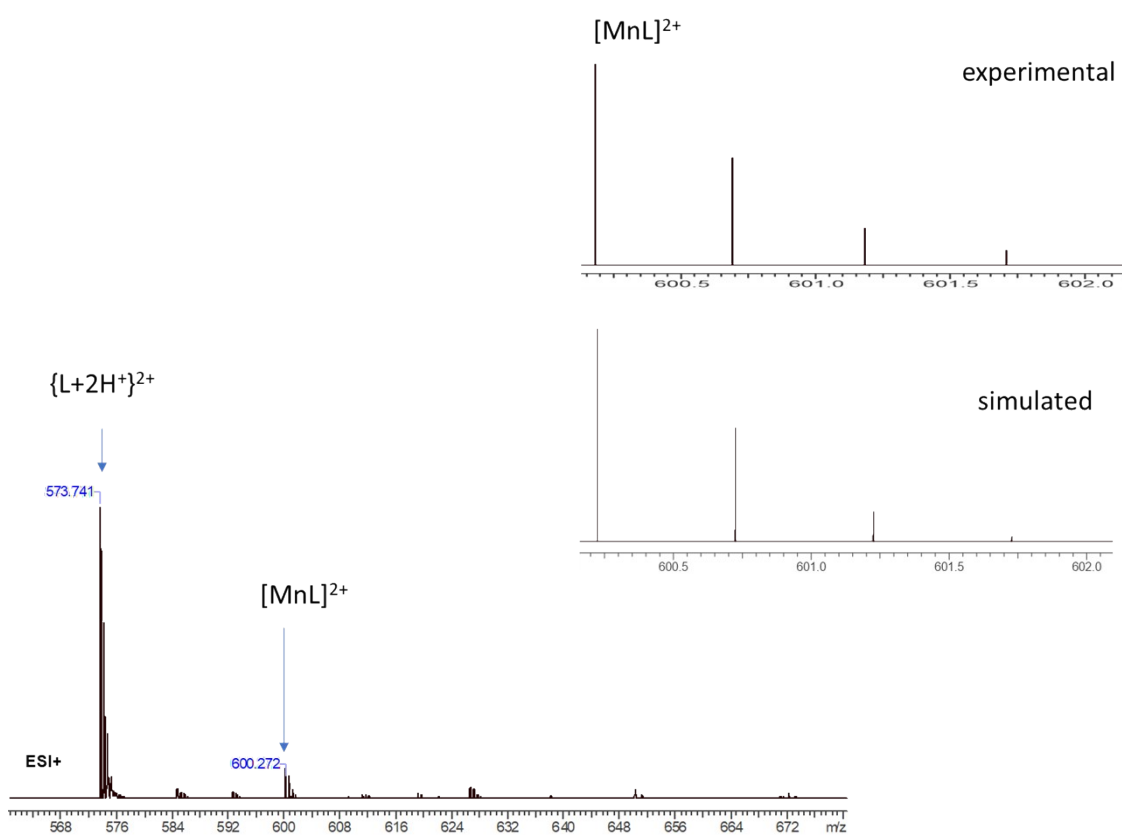

**Figure S3.** Mass spectrum acquired for Mn(II):L1 system. The comparison of the experimental and simulated isotopic pattern of the peak at  $m/z = 600.27$  is shown on the right.

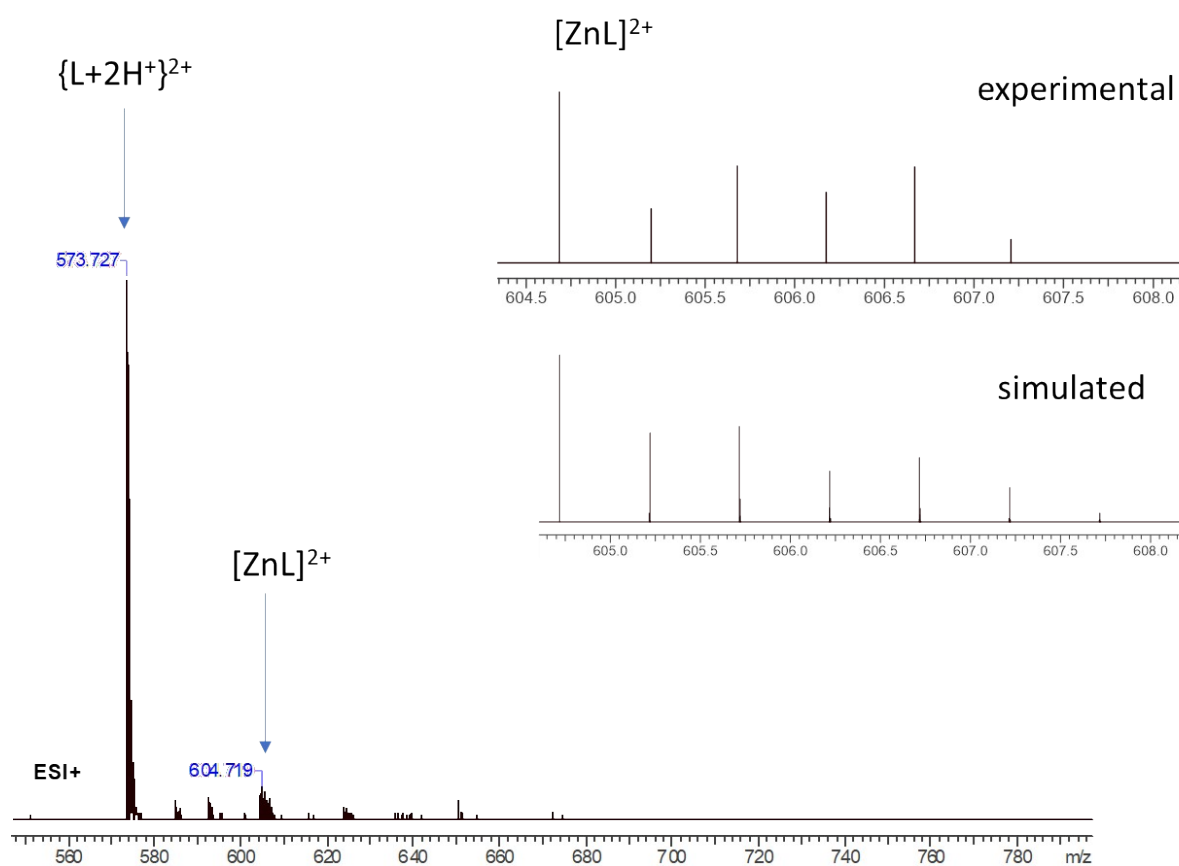

**Figure S4.** Mass spectrum acquired for Zn(II):L1 system. The comparison of the experimental and simulated isotopic pattern of the peak at  $m/z = 604.72$  is shown on the right.

**Table S2.** Comparison of the  $m/z$  of the major signals observed in ESI-MS spectra for M(II):L1 systems, M:L=1:1.

| System    | Ion               | $m/z$        |           |
|-----------|-------------------|--------------|-----------|
|           |                   | experimental | simulated |
| Fe(II):L1 | $[FeL]^{2+}$      | 599.72       | 599.72    |
|           | $\{[L]+2H\}^{2+}$ | 573.76       | 573.76    |
|           | $\{[L]+H^+\}^+$   | 1146.52      | 1146.52   |
| Mn(II):L1 | $[MnL]^{2+}$      | 600.21       | 600.22    |
|           | $\{[L]+2H\}^{2+}$ | 573.76       | 573.76    |
|           | $\{[L]+H^+\}^+$   | 1146.52      | 1146.52   |
| Zn(II):L1 | $[ZnL]^{2+}$      | 604.71       | 604.72    |
|           | $\{[L]+2H\}^{2+}$ | 573.76       | 573.76    |
|           | $\{[L]+H^+\}^+$   | 1146.51      | 1146.52   |

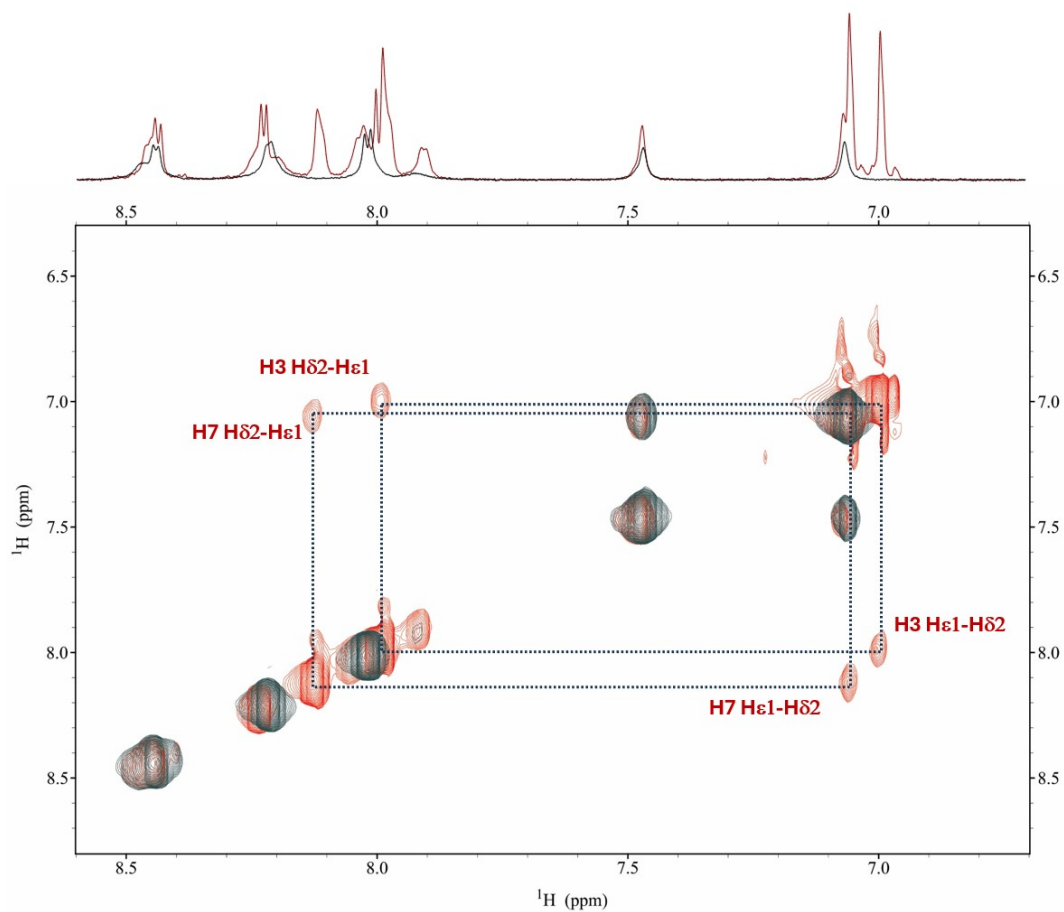

**Figure S5.** Comparison of the selected aromatic region of the  $^1\text{H}$ - $^1\text{H}$  TOCSY spectra for the free peptide **L1** (red) and the  $\text{Fe}(\text{II})$ :**L1** complex (black) at a 0.3:1 molar ratio, at pH 7. Signals exhibiting significant chemical shift perturbations upon  $\text{Fe}^{2+}$  coordination are highlighted in red.

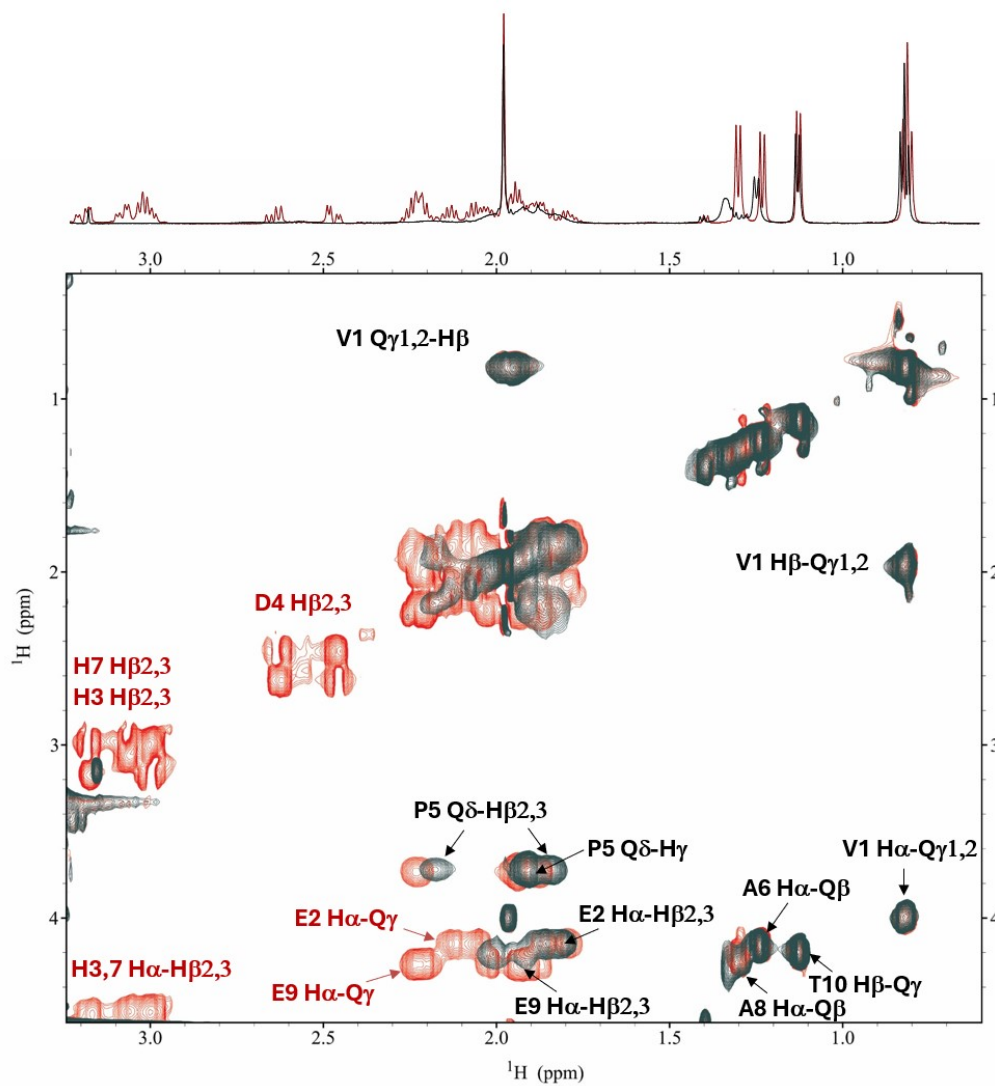

**Figure S6.** Comparison of the selected aliphatic region of the  $^1\text{H}$ - $^1\text{H}$  TOCSY spectra for the free peptide **L1** (red) and the  $\text{Fe(II):L1}$  complex (black) at a 0.3:1 molar ratio, at pH 7. Signals exhibiting significant chemical shift perturbations upon  $\text{Fe}^{2+}$  coordination are highlighted in red.

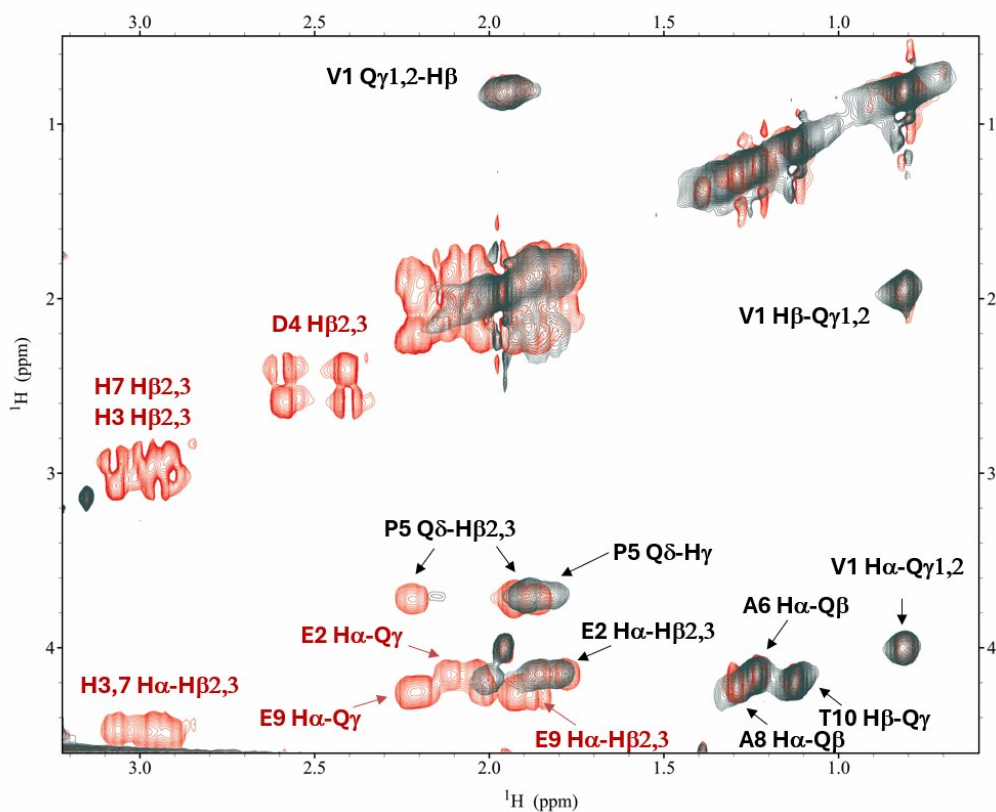

**Figure S7.** Comparison of the selected aliphatic region of the  $^1\text{H}$ - $^1\text{H}$  TOCSY spectra for the free peptide **L1** (red) and the  $\text{Fe(II):L1}$  complex (black) at a 0.3:1 molar ratio, at pH 8.9. Signals exhibiting significant chemical shift perturbations upon  $\text{Fe}^{2+}$  coordination are highlighted in red.

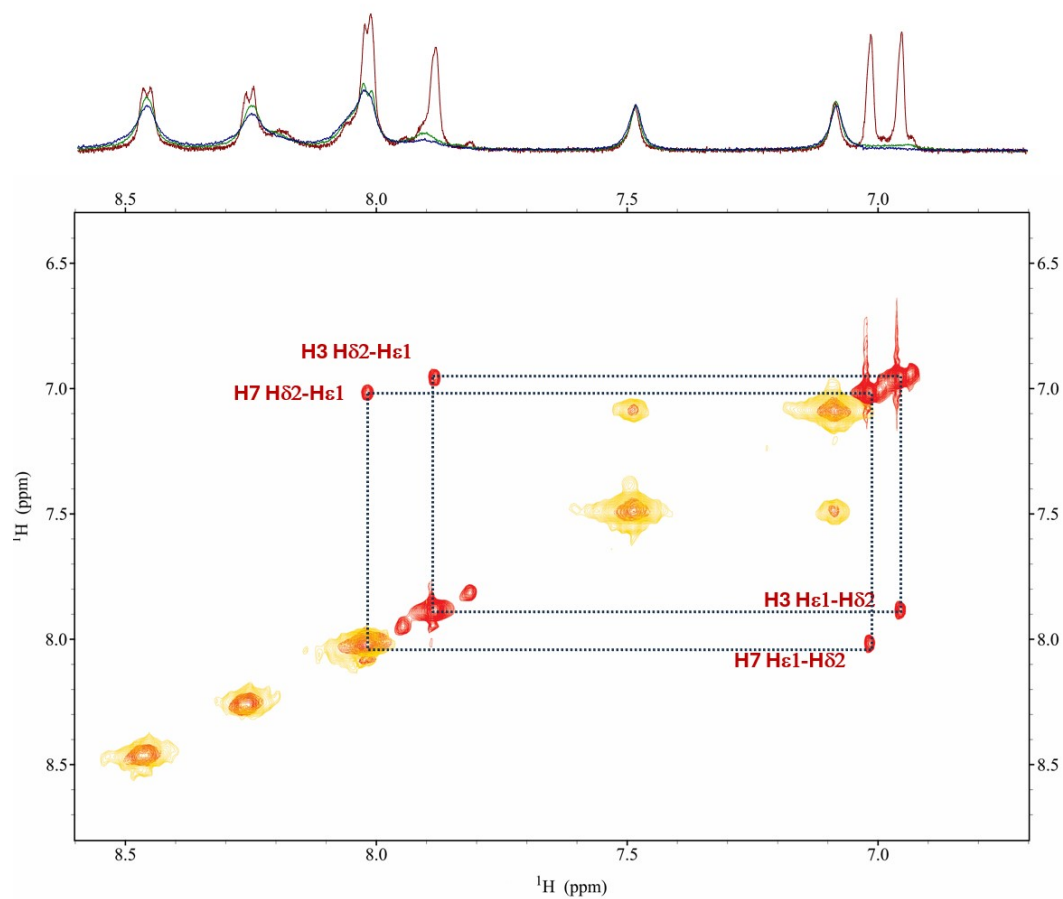

**Figure S8.** Comparison of the selected aromatic region of the  $^1\text{H}$ - $^1\text{H}$  TOCSY spectra for the free peptide **L1** (red) and the  $\text{Mn(II):L1}$  complex (gold) at a 0.005:1 molar ratio, at pH 7. Signals exhibiting significant chemical shift perturbations upon  $\text{Fe}^{2+}$  coordination are highlighted in red.

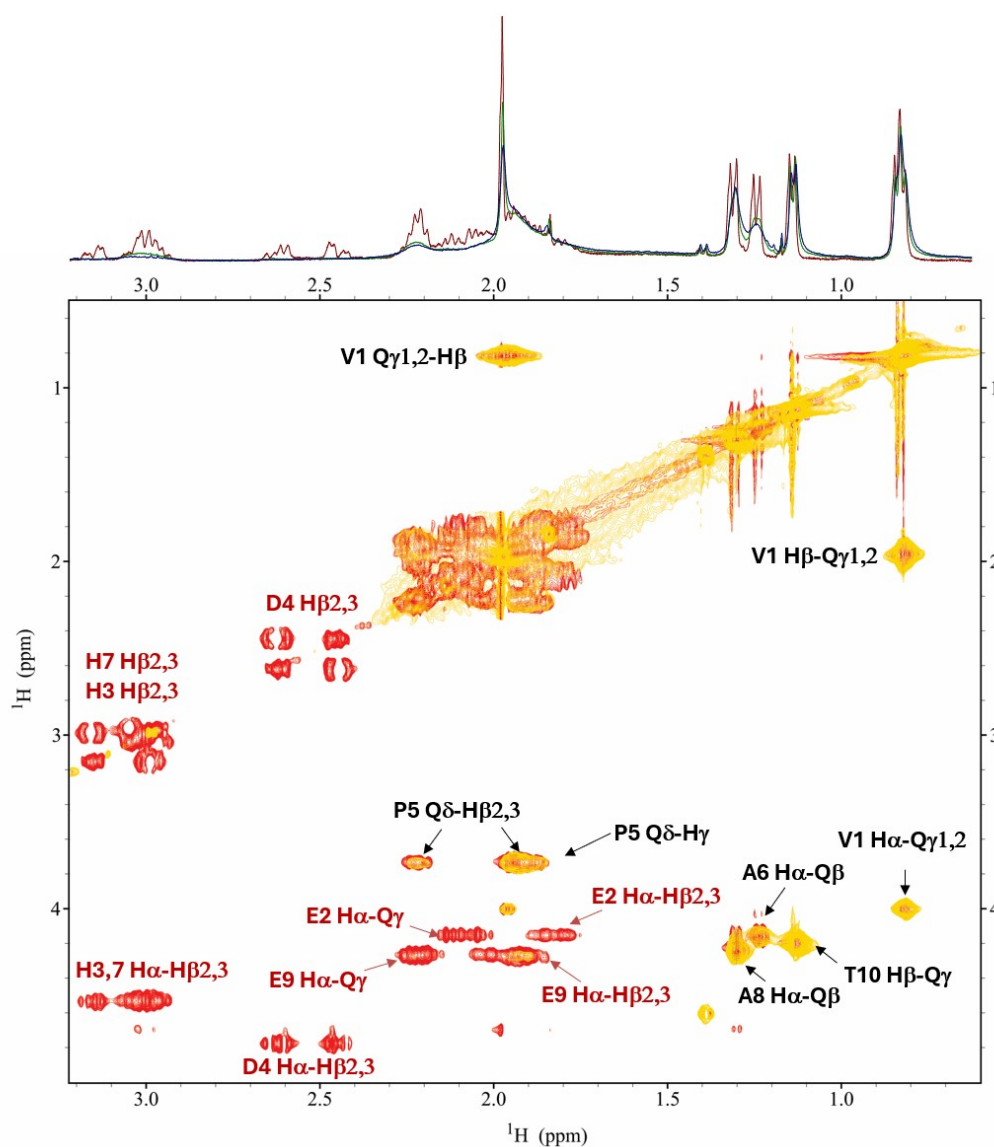

**Figure S9.** Comparison of the selected aliphatic region of the  $^1\text{H}$ - $^1\text{H}$  TOCSY spectra for the free peptide **L1** (red) and the  $\text{Mn(II):L1}$  complex (gold) at a 0.0,05:1 molar ratio, at pH 7. Signals exhibiting significant chemical shift perturbations upon  $\text{Mn}^{2+}$  coordination are highlighted in red.

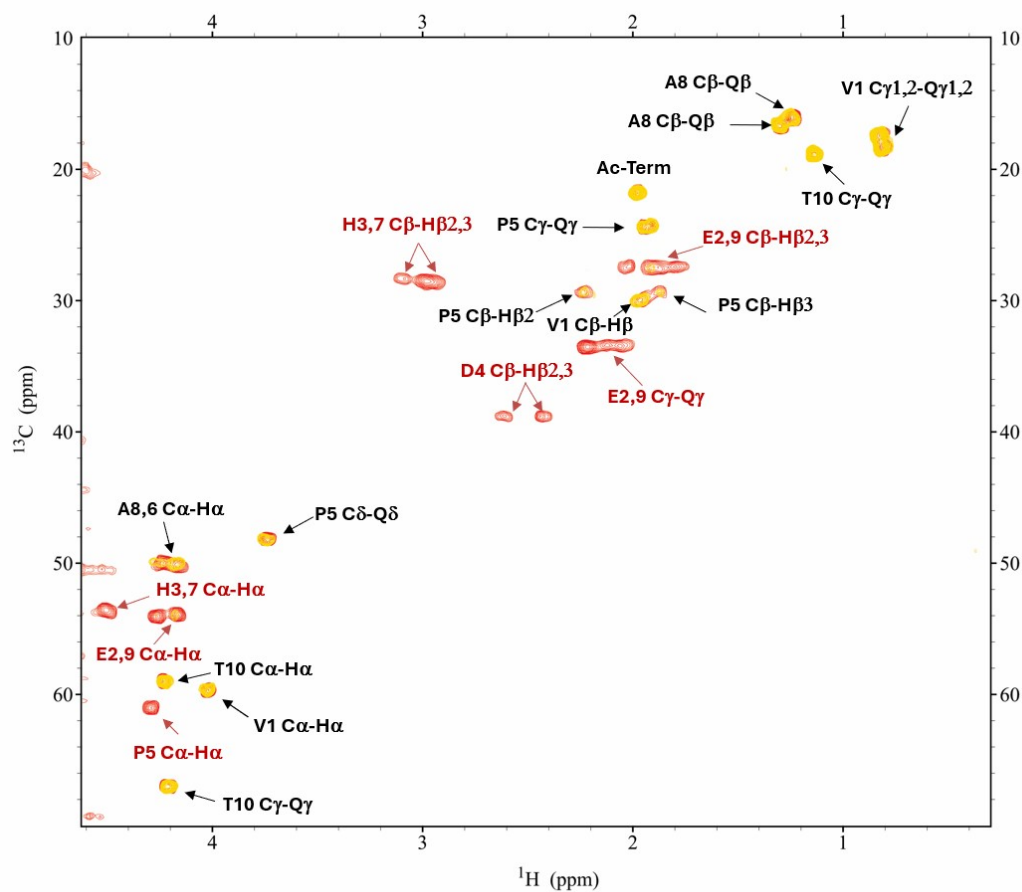

**Figure S10.** Comparison of the selected aromatic region of the  $^1\text{H}$ - $^{13}\text{C}$  HSQC spectra for the free peptide **L1** (red) and the Mn(II):**L1** complex (gold) at a 0.005:1 molar ratio, at pH 9. Signals exhibiting significant chemical shift perturbations upon Mn<sup>2+</sup> coordination are highlighted in red.

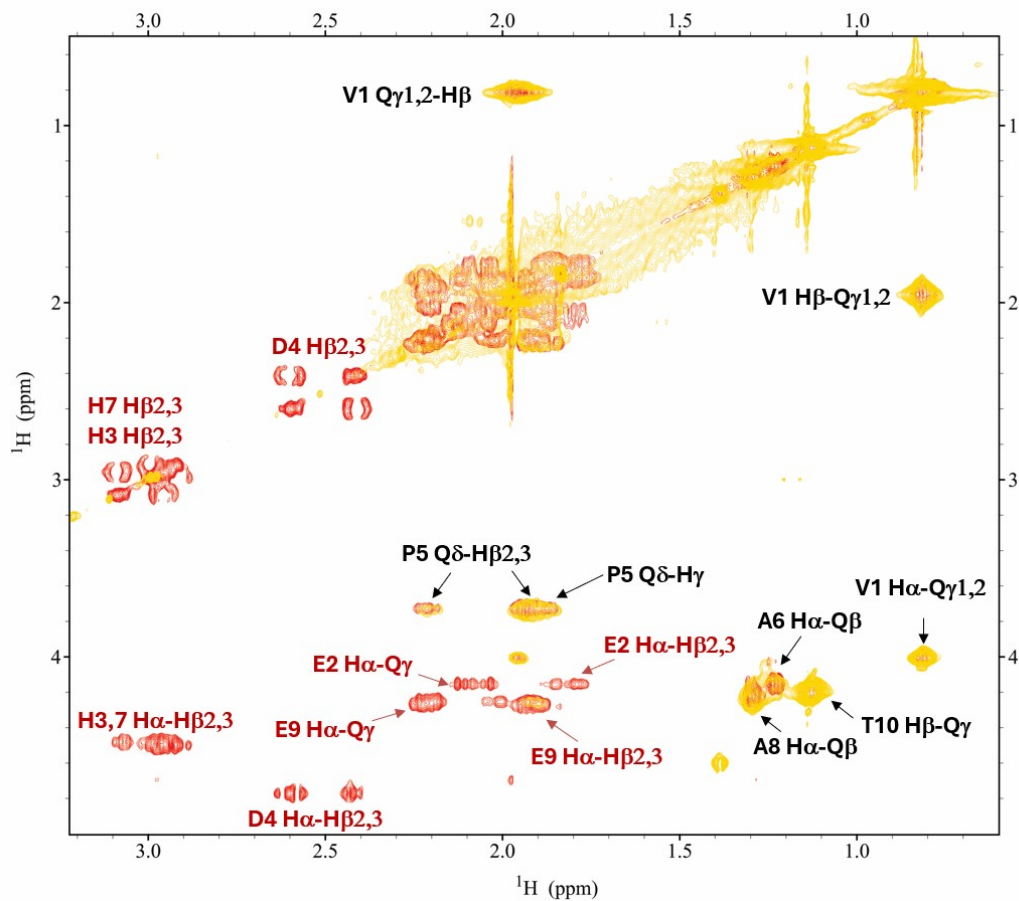

**Figure S11.** Comparison of the selected aliphatic region of the  $^1\text{H}$ - $^1\text{H}$  TOCSY spectra for the free peptide **L1** (red) and the  $\text{Mn(II):L1}$  complex (gold) at a 0.0,05:1 molar ratio, at pH 9. Signals exhibiting significant chemical shift perturbations upon  $\text{Mn}^{2+}$  coordination are highlighted in red.

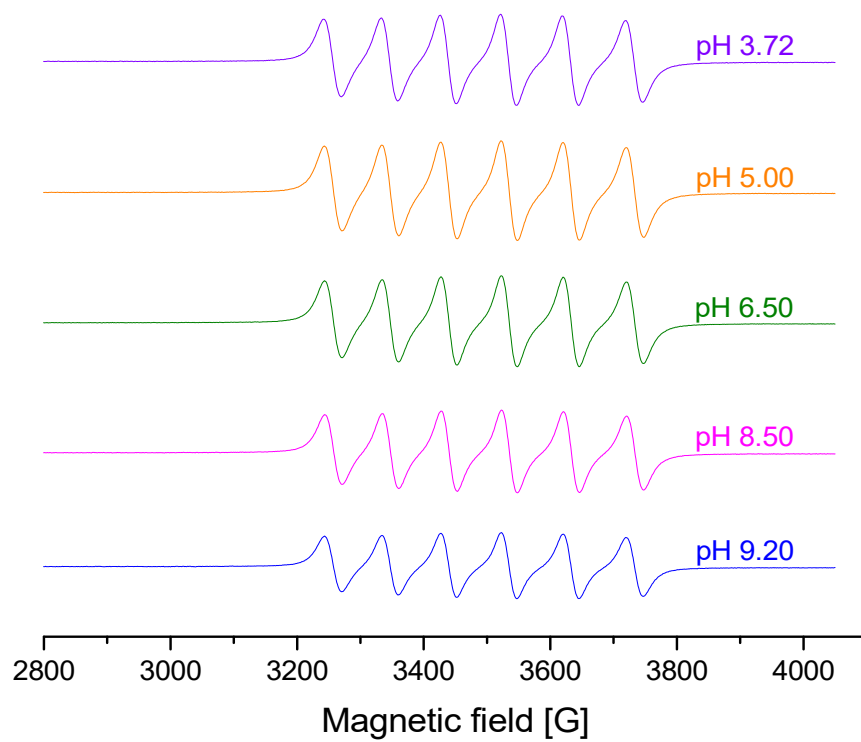

**Figure S12.** Spectra acquired for Mn(II):L1 system at various pH values at room temperature.  $L_{\text{[tot]}} = 1 \text{ mM}$ , Mn(II):L = 1:1.1.

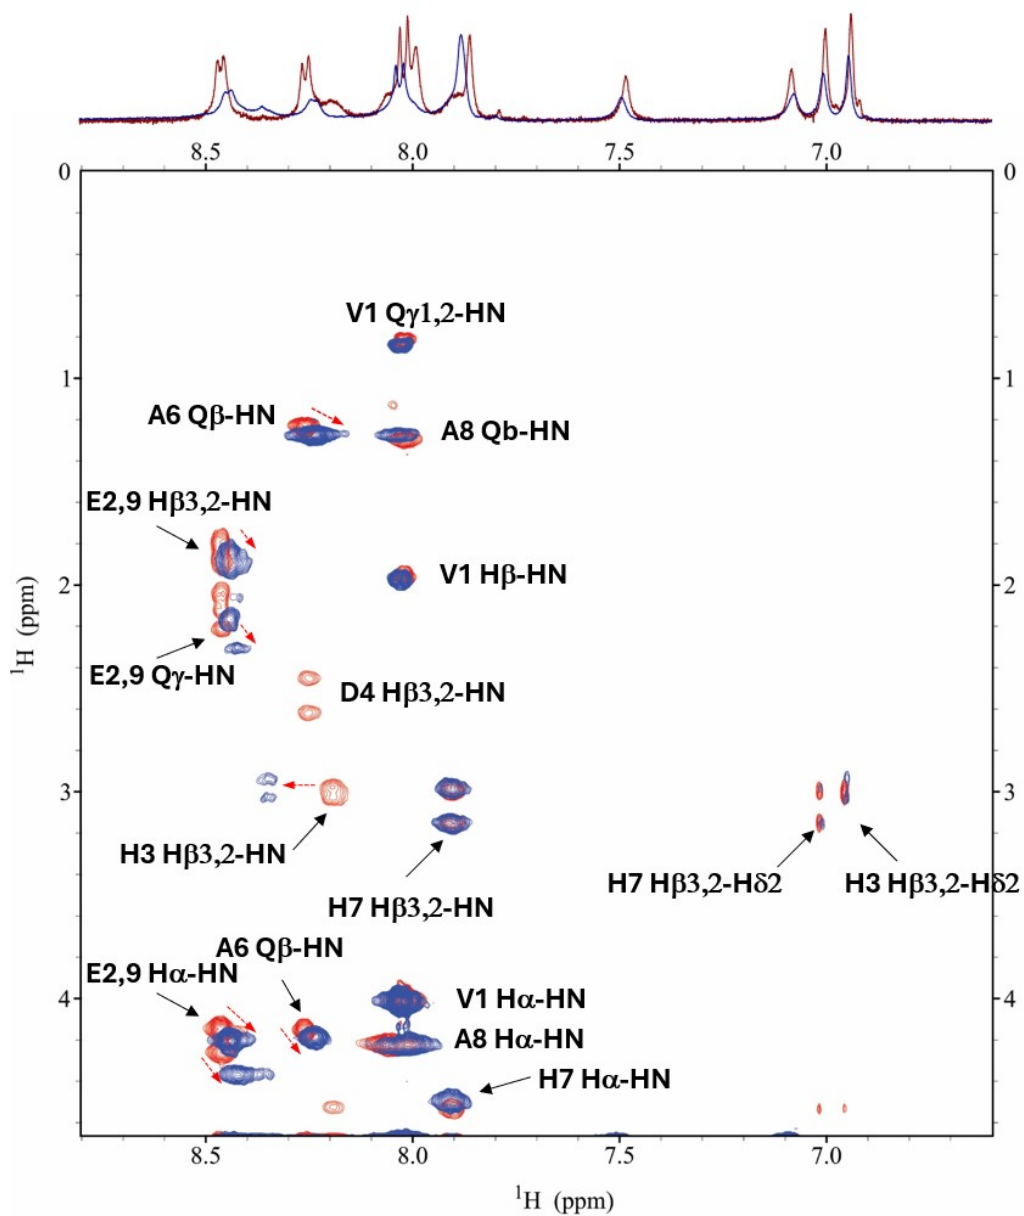

**Figure S13.** Comparison of the selected aromatic region of the  $^1\text{H}$ - $^1\text{H}$  TOCSY spectra for the free peptide **L1** (red) and the  $\text{Zn(II):L1}$  complex (blue) at a 1:1 molar ratio, at pH 7. Signals showing significant chemical shift changes upon  $\text{Zn}^{2+}$  coordination are indicated by red arrows.

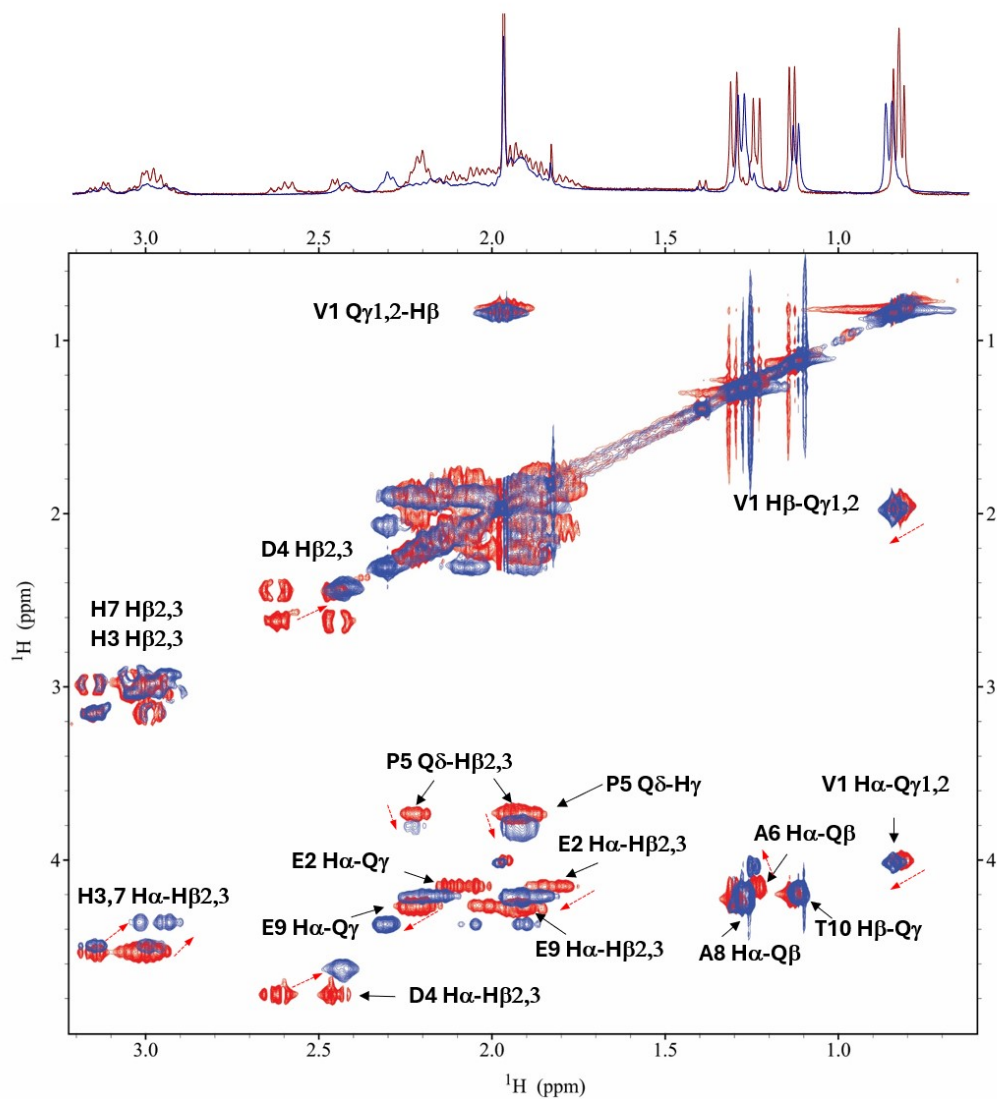

**Figure S14.** Comparison of the selected aliphatic region of the  $^1\text{H}$ - $^1\text{H}$  TOCSY spectra for the free peptide **L1** (red) and the  $\text{Zn(II):L1}$  complex (blue) at a 1:1 molar ratio, at pH 7. Signals showing significant chemical shift changes upon  $\text{Zn}^{2+}$  coordination are indicated by red arrows.

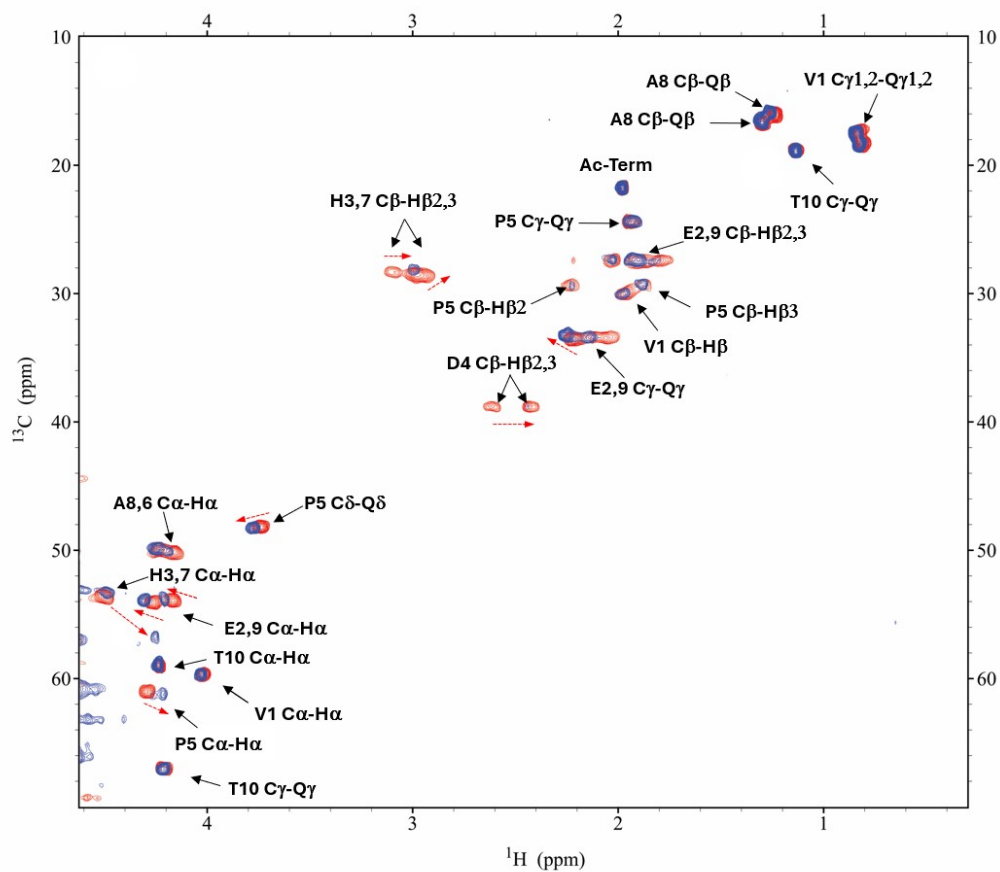

**Figure S15.** Comparison of the aliphatic region of the  $^1\text{H}$ - $^{13}\text{C}$  HSQC spectra for the free peptide **L1** (red) and the  $\text{Zn(II):L1}$  complex (blue) at a 1:1 molar ratio, at pH 9.1. Signals exhibiting significant chemical shift changes upon  $\text{Zn}^{2+}$  coordination are highlighted in red arrows.

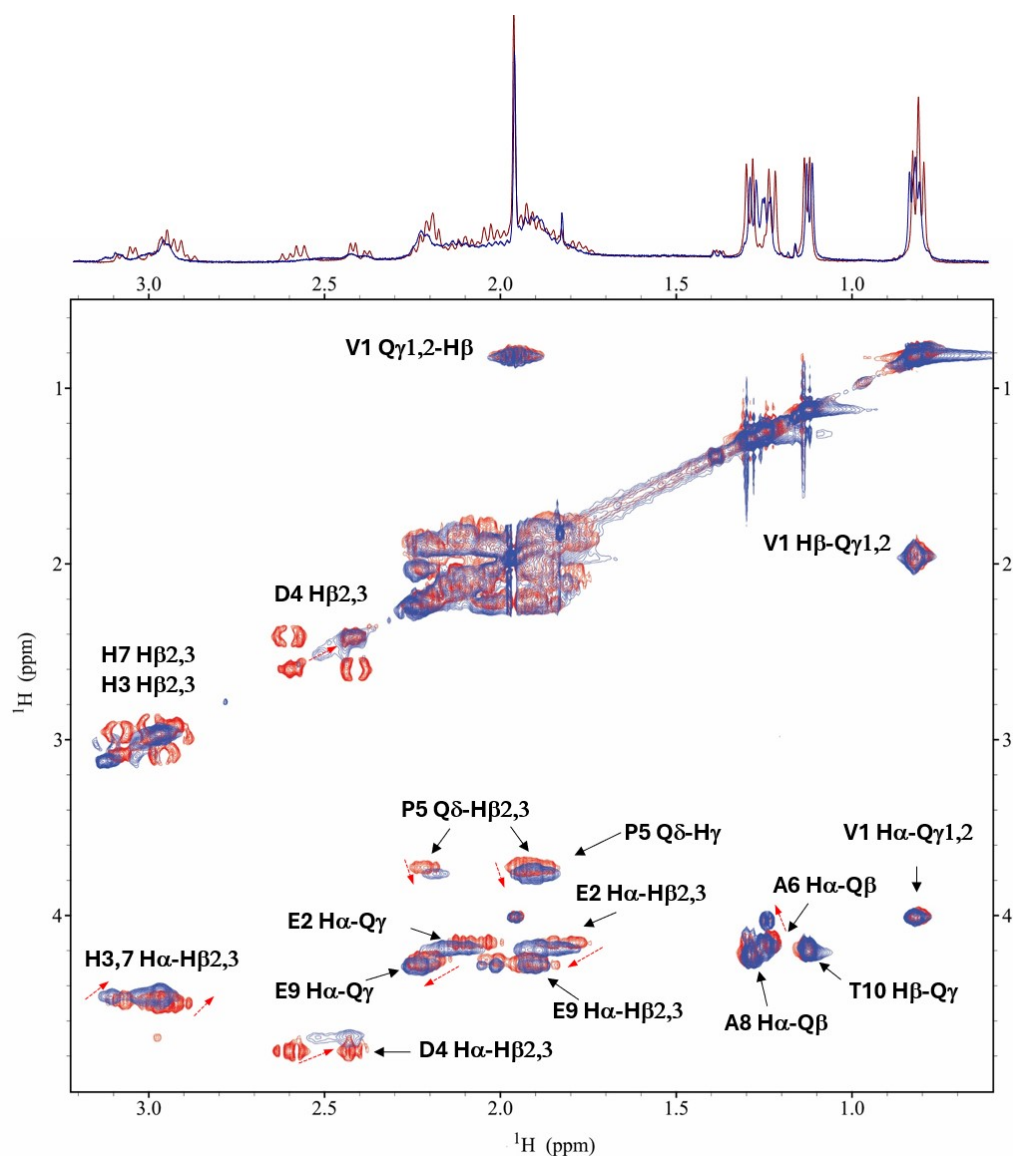

**Figure S16.** Comparison of the selected aliphatic region of the  $^1\text{H}$ - $^1\text{H}$  TOCSY spectra for the free peptide **L1** (red) and the  $\text{Zn(II):L1}$  complex (blue) at a 1:1 molar ratio, at pH 9.1. Signals showing significant chemical shift changes upon  $\text{Zn}^{2+}$  coordination are indicated by red arrows.

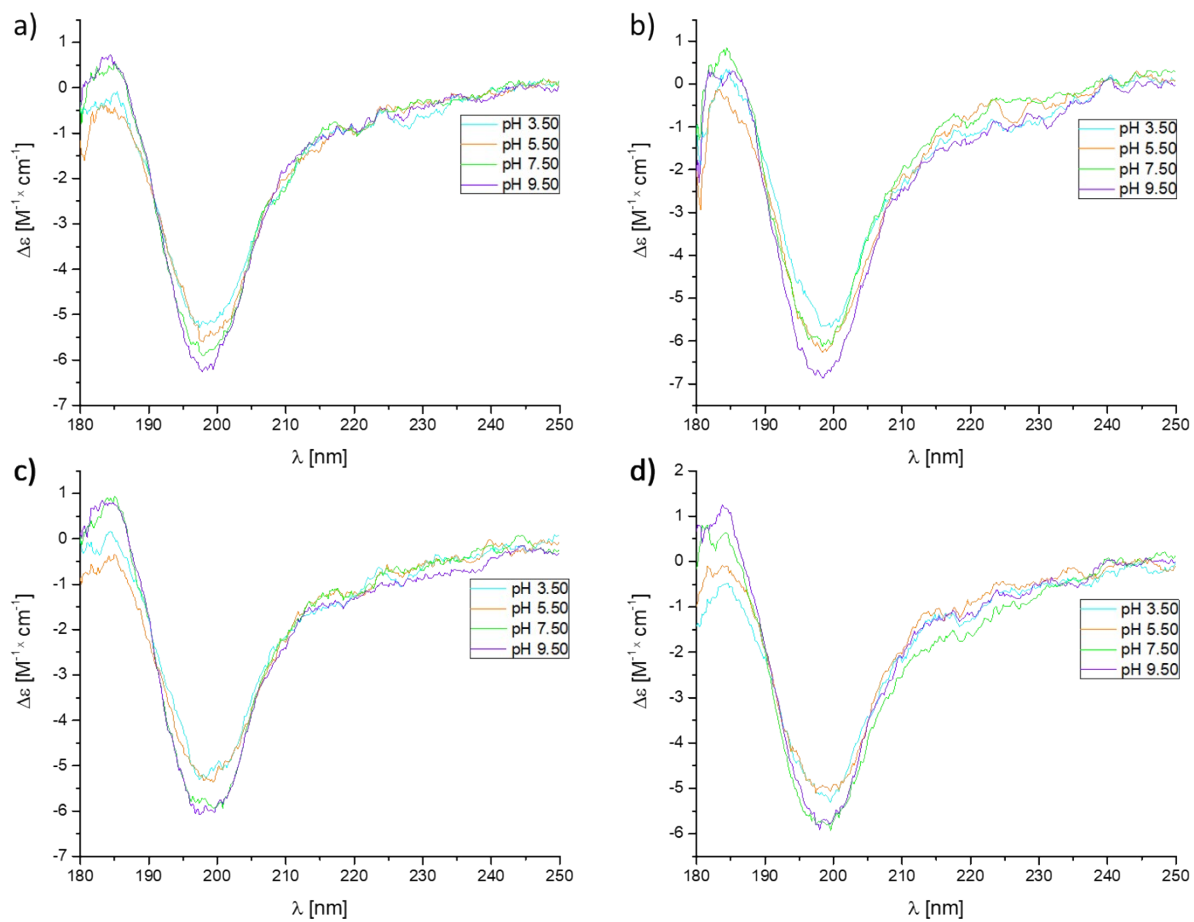

**Figure S17.** Far UV CD spectra of the systems: a) free L1, b) Fe(II):L1, c) Mn(II):L1, d) Zn(II):L1.  $L_{[tot]} = 0.35$  mM, M:L= 1:1.1.
